# Supplementary material
Source: PubMed Central journal article supplement (PMC3267840)

### Dopamine

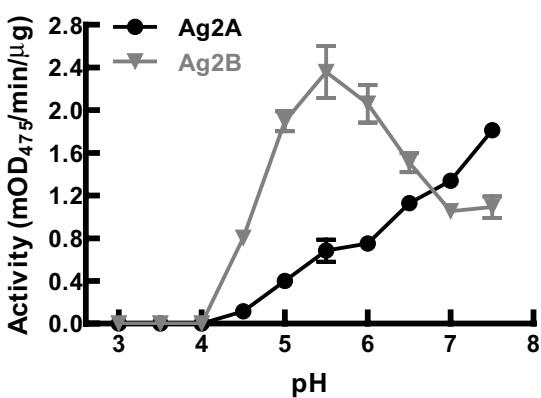

### Dopamine

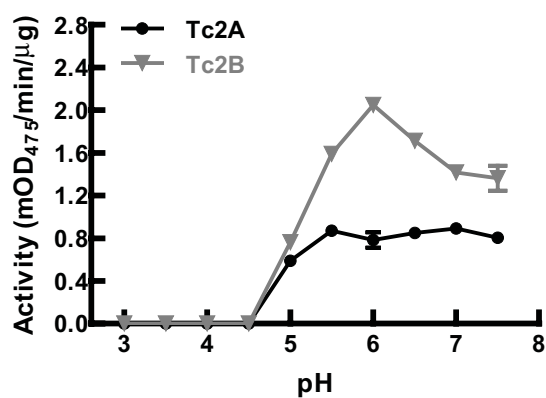

### NADA

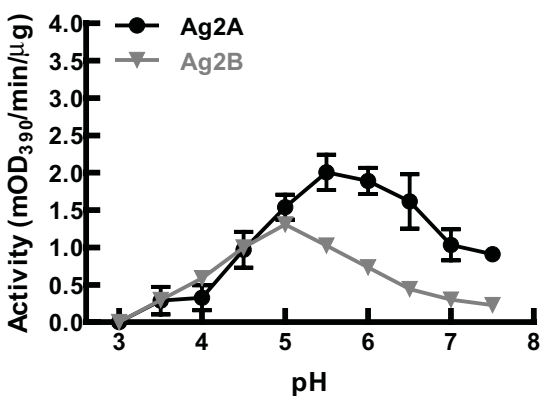

### NADA

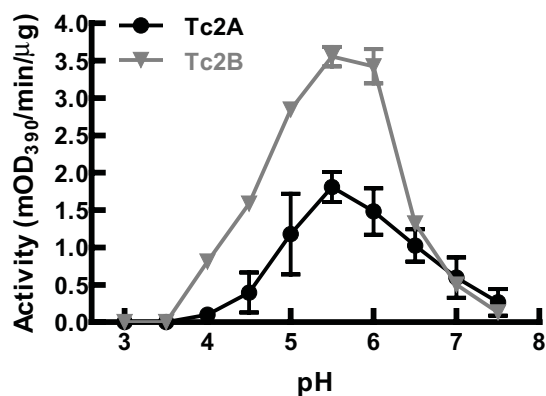

### NBAD

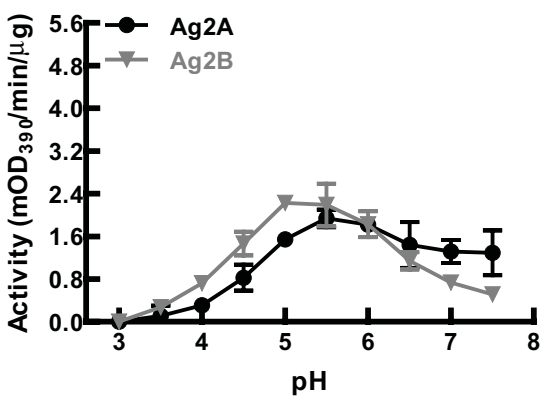

### NBAD

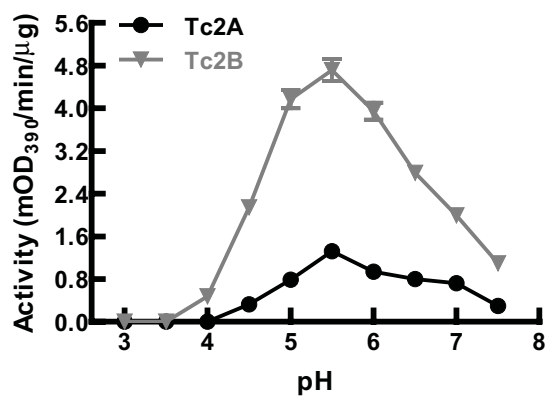

### Dopa

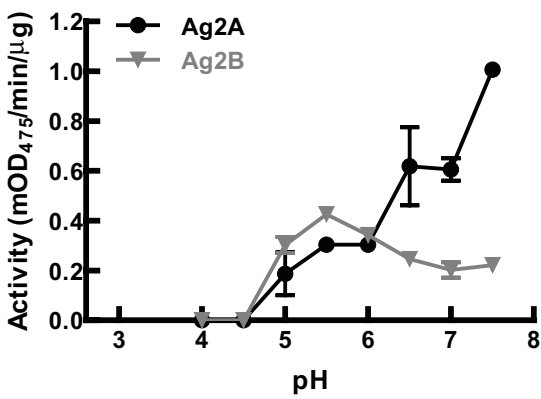

### Dopa

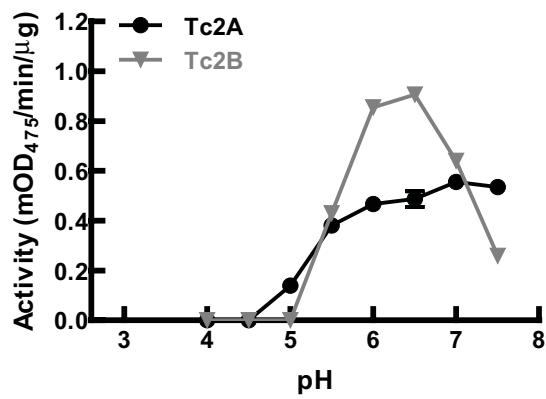

Supplement: NIHMS345688-supplement-02.pdf [file NIHMS345688-supplement-02.pdf]

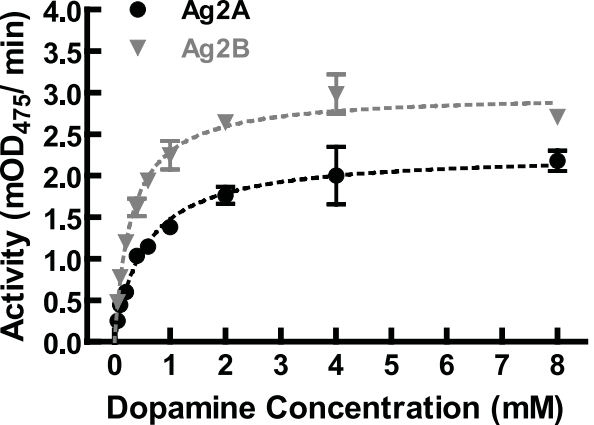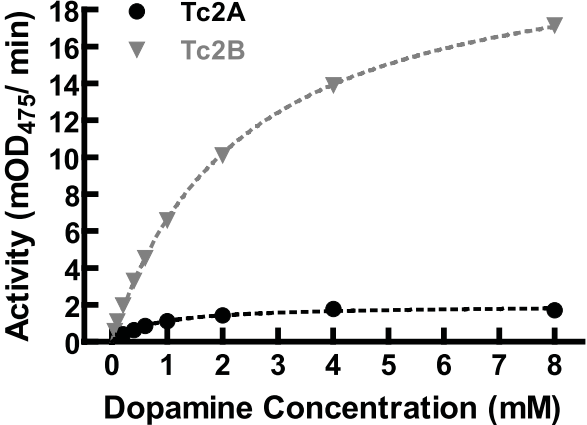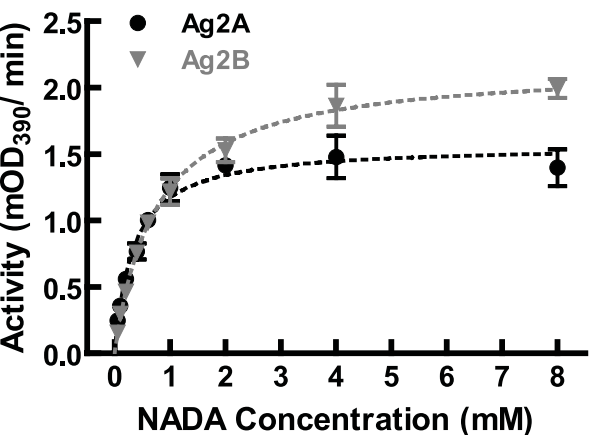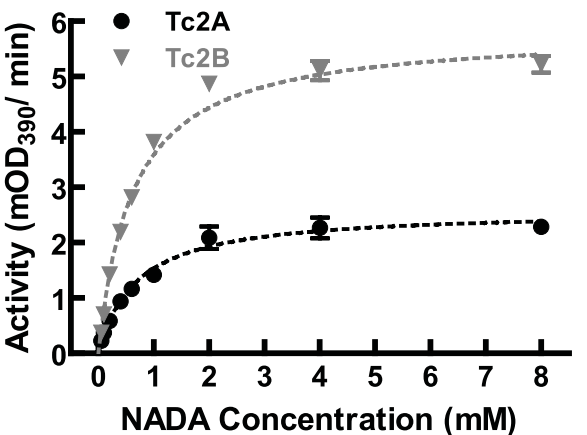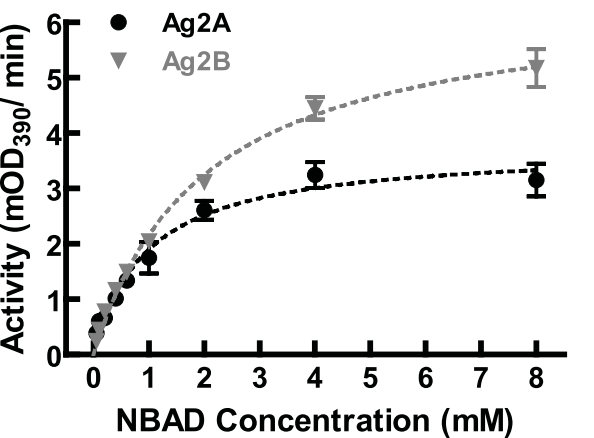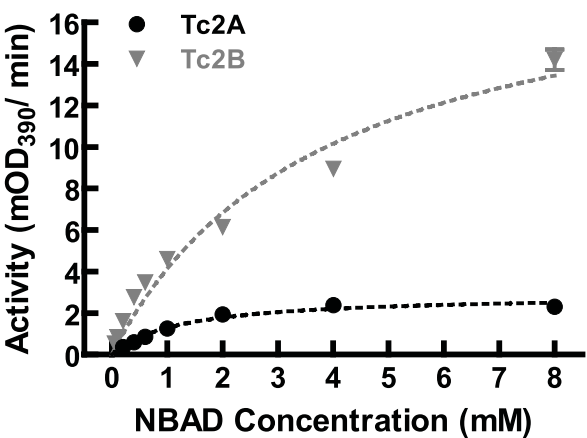

Supplement: NIHMS345688-supplement-03.pdf [file NIHMS345688-supplement-03.pdf]

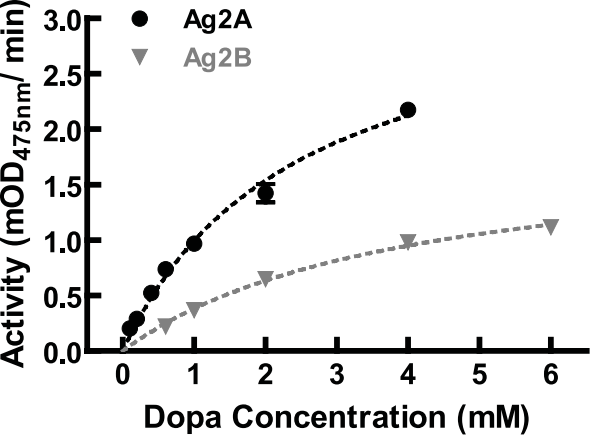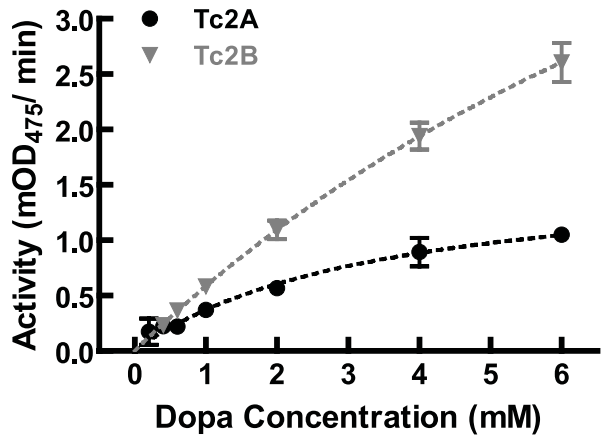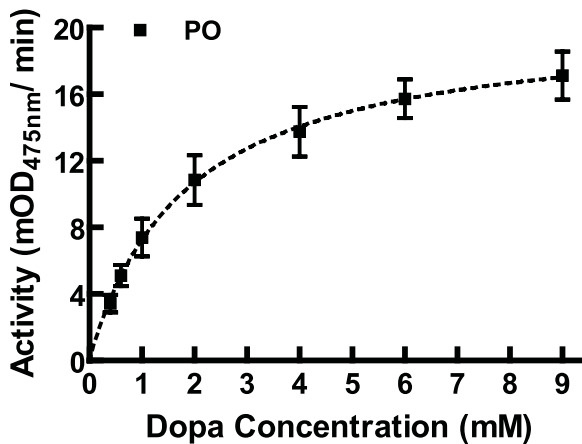

Supplement: NIHMS345688-supplement-04.pdf [file NIHMS345688-supplement-04.pdf]

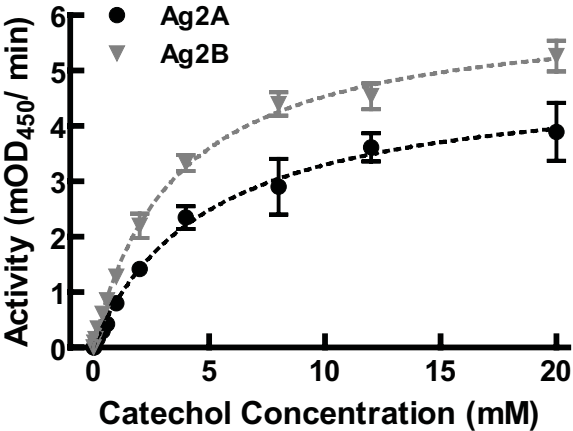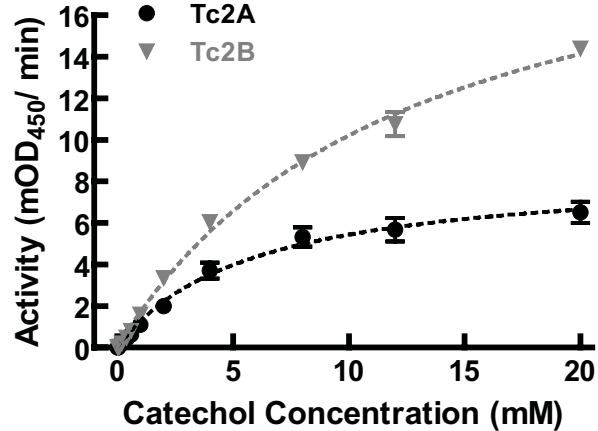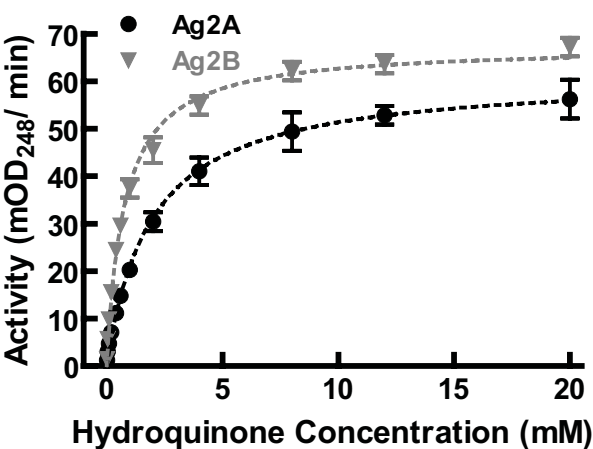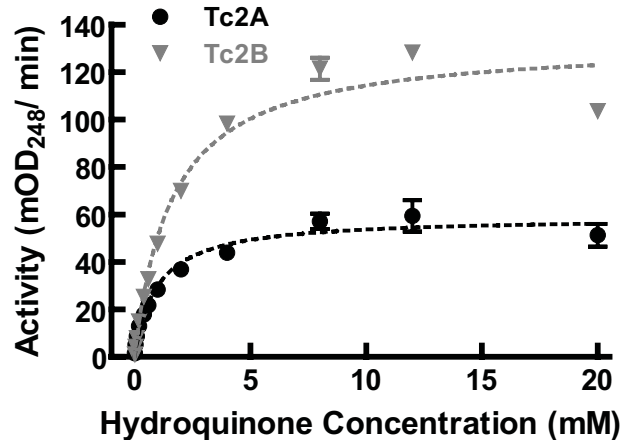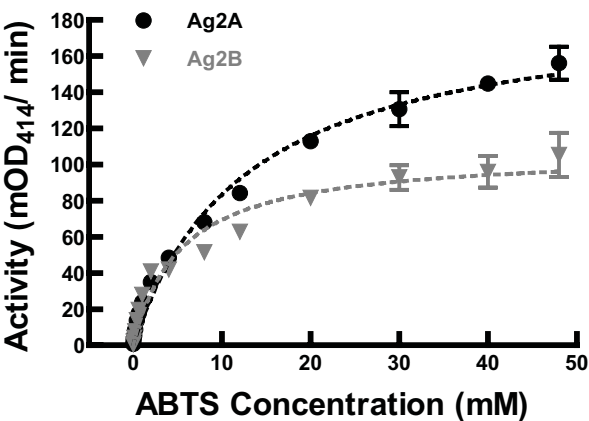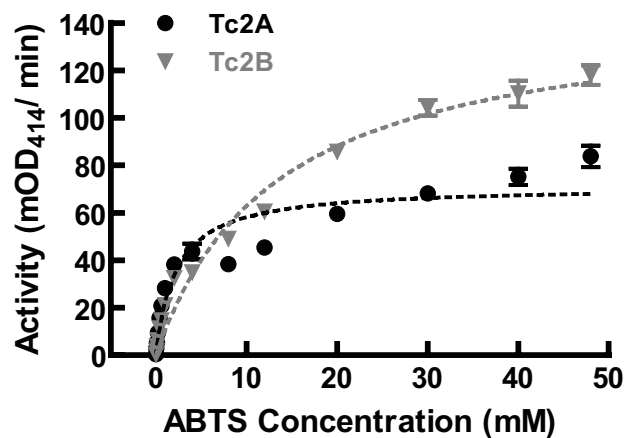

Supplement: NIHMS345688-supplement-05.pdf [file NIHMS345688-supplement-05.pdf]

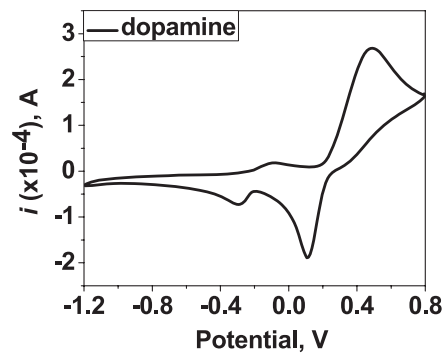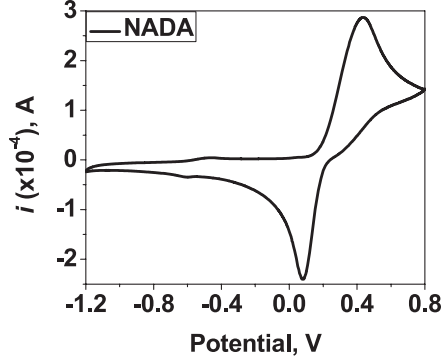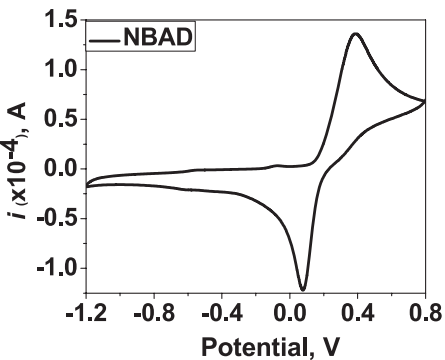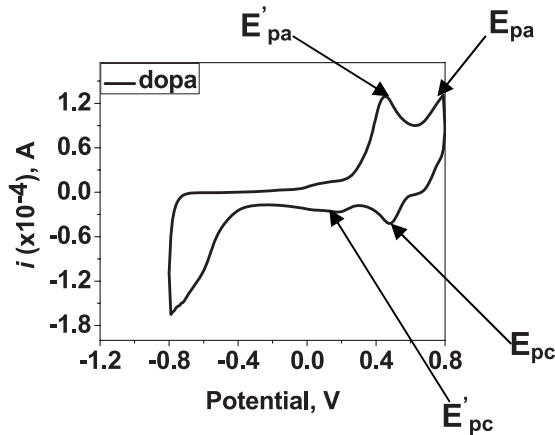

Supplement: NIHMS345688-supplement-06.pdf [file NIHMS345688-supplement-06.pdf]
